# Supplementary material for: Identification and Analysis of Unstructured, Linear B-Cell Epitopes in SARS-CoV-2 Virion Proteins for Vaccine Development
Source: PubMed Central journal article supplement (PMC7564417; doi:10.3390/vaccines8030397), 2020-07-20
Supplement: vaccines-08-00397-s001.pdf [file vaccines-08-00397-s001.pdf]

Supplementary material to

**Identification and analysis of unstructured, linear B-cell epitopes in SARS-CoV-2 virion proteins  
for vaccine development**

Andrés Corral-Lugo, Mireia López-Siles, Daniel López, Michael J. McConnell and

Antonio J. Martín-Galiano

**Supplementary Data S1. Conservation of B-cell epitopes in S, E, M and N protein across coronavirus species.** Independent sequence alignments between uBCELS/BCEH of SARS-CoV-2, and equivalent sequences in SARS-CoV and three bat coronavirus samples: bat-SL-CoVZXC21, bat-SL-CoVZC45 and RaTG13. For clarity, SARS-CoV and SARS-CoV-2 headers are in bold letters. Residues in uBCEs are in capital letters while the rest of the loop is in lowercase. Identical residues to SARS-CoV-2 sequences are highlighted in green. Deletions are indicated with dashes.

## S protein

### uBCEL-S1

```

SARS-CoV          20_ddvqaPNYTQHTS_32
Bat-SL-CoVZXC21   17_-dltGRTPLINENY_28
Bat-SL-CoVZC45   17_vnltGRTPLINENY_29
RaTG13            15_vnlttRTQLPPAY_27
SARS-CoV-2      15_vnlttRTQLPPAY_27
:

```

### uBCEL-S2

```

SARS-CoV          72_in-----HTFGNpvi_p_82
Bat-SL-CoVZXC21   68_lttN-NAAATKRFDNpild_84
Bat-SL-CoVZC45   69_lttN-NAAATKRFDNpild_85
RaTG13            68_ihvSGTNGIKRFDNpvlp_85
SARS-CoV-2      68_ihvSGTNGTKRFDNpvlp_85
:                :   .**::

```

### uBCEL-S3

```

SARS-CoV          389_vkGDDVRQIAPggtgviadynyklpddf_416
Bat-SL-CoVZXC21   397_lrFSEVRQVAPggtgviadynyklpddf_424
Bat-SL-CoVZC45   398_lrFSEVRQVAPggtgviadynyklpddf_425
RaTG13            402_itGDEVQRQIAPggtgkiadynyklpddf_429
SARS-CoV-2      402_lrGDEVQRQIAPggtgkiadynyklpddf_429
:                .:***:***** *****

```

### uBCEL-S4

```

SARS-CoV          427_NIDATStgnyn_437
Bat-SL-CoVZXC21   435_KQDT-----gh_440
Bat-SL-CoVZC45   436_KQDV-----gn_441
RaTG13            440_HIDAKEggnfn_450
SARS-CoV-2      440_NLDSKVggnyn_450
:                *

```

uBCEL-S5

**SARS-CoV** 442\_ylrhGKLRPFERDISNVPFSPDGKPCtp-palncywp\_477  
 Bat-SL-CoVZXC21 445\_shrsTKLKPFERDLSSDENG-----vrt\_467  
 Bat-SL-CoVZC45 446\_shrsTKLKPFERDLSSDENG-----vrt\_468  
 RaTG13 455\_lfrkANLKPFERDISTEIQAGSKPCngqtglncyyp\_491  
**SARS-CoV-2** 455\_lfrkSNLKPFERDISTEIQAGSTPCngvegfnicyfp\_491

\* :\*:\*\*\*\*\*:\*

uBCEL-S6

**SARS-CoV** 601\_VNCTDVSTAIHADQLTpawriystgnnv\_628  
 Bat-SL-CoVZXC21 591\_VNCTDVPTTIHADQLTpawriyaigtsv\_618  
 Bat-SL-CoVZC45 592\_VNCTDVPTTIHADQLTpawriyatgtnv\_619  
 RaTG13 615\_VNCTEVPVAIHADQLTptwrvystgsv\_642  
**SARS-CoV-2** 615\_VNCTEVPVAIHADQLTptwrvystgsv\_642

\*\*\*\*:\* .:\*\*\*\*\*:\*\*\*:\* \*..\*

uBCEL-S7

**SARS-CoV** 662\_TVSL----LRSTsq\_671  
 Bat-SL-CoVZXC21 652\_TASI----LRSTgq\_661  
 Bat-SL-CoVZC45 653\_TASI----LRSTsq\_662  
 RaTG13 676\_TQTNS----RSVas\_685  
**SARS-CoV-2** 676\_TQTNSPRRARSVas\_689

\* : \*\*...

uBCEL-S8

**SARS-CoV** 765\_AQVKQMYKTPTLKYFggfnfs\_785  
 Bat-SL-CoVZXC21 755\_AQVKQIYKTPPIKDFggfnfs\_775  
 Bat-SL-CoVZC45 756\_AQVKQIYKTPPIKDFggfnfs\_776  
 RaTG13 779\_AQVKQIYKTPPIKDFggfnfs\_799  
**SARS-CoV-2** 783\_AQVKQIYKTPPIKDFggfnfs\_803

\*\*\*\*\*:\*\*\*\*\* :\* \*\*\*\*\*

uBCEL-S9

**SARS-CoV** 1107\_NCDVVIG\_1113  
 Bat-SL-CoVZXC21 1097\_NCDVVIG\_1103  
 Bat-SL-CoVZC45 1098\_NCDVVIG\_1104  
 RaTG13 1121\_SCDVVIG\_1127  
**SARS-CoV-2** 1125\_NCDVVIG\_1131

.\*\*\*\*\*

**uBCEL-S10**

|                   |      |                     |      |
|-------------------|------|---------------------|------|
| <b>SARS-CoV</b>   | 1118 | <b>TVYDPLQPELDS</b> | 1129 |
| Bat-SL-CoVZXC21   | 1108 | <b>TVYDPLQPELDS</b> | 1119 |
| Bat-SL-CoVZC45    | 1109 | <b>TVYDPLQPELDS</b> | 1120 |
| RaTG13            | 1132 | <b>TVYDPLQPELDS</b> | 1143 |
| <b>SARS-CoV-2</b> | 1136 | <b>TVYDPLQPELDS</b> | 1147 |

\*\*\*\*\*

**uBCEL-S11**

|                   |      |                  |      |
|-------------------|------|------------------|------|
| <b>SARS-CoV</b>   | 1220 | <b>tsCCSCLKG</b> | 1228 |
| Bat-SL-CoVZXC21   | 1210 | <b>tsCCSCLKG</b> | 1218 |
| Bat-SL-CoVZC45    | 1211 | <b>tsCCSCLKG</b> | 1219 |
| RaTG13            | 1234 | <b>tsCCSCLKG</b> | 1242 |
| <b>SARS-CoV-2</b> | 1238 | <b>tsCCSCLKG</b> | 1246 |

\*\*\*\*\*



## M protein

### uBCEL-M1

|                   |     |        |      |      |     |
|-------------------|-----|--------|------|------|-----|
| <b>SARS-CoV</b>   | 208 | DHAGSN | Dnia | llvq | 221 |
| Bat-SL-CoVZC45    | 209 | DHSSSS | Dnia | llvq | 222 |
| Bat-SL-CoVZXC21   | 209 | DHSSSS | Dnia | llvq | 222 |
| RaTG13            | 209 | DHSSSS | Dnia | llvq | 222 |
| <b>SARS-CoV-2</b> | 209 | DHSSSS | Dnia | llvq | 222 |

\*\*\*:.\*.\*\*\*\*\*

## **N protein**

### **uBCEL-N1**

```
SARS-CoV          19_ GGPTDSTDNQNGGRNGARPKQRRPQGLPNntaswfta 56
Bat-SL-CoVZXC21   18_ GGPSDSSDNSQNGERNGARPKQRRPQGLPNntaswfta 55
Bat-SL-CoVZC45    18_ GGPSDSSDNSKNGERNGARPKQRRPQGLPNntaswfta 55
RaTG13            18_ GGPSDSTGSNQNGERSGARPKQRRPQGLPNntaswfta 55
SARS-CoV-2        18_ GGPSDSTGSNQNGERSGARSKQRRPQGLPNntaswfta 55
***:***:..:*** * .*** *****
```

### **uBCEL-N2**

```
SARS-CoV          60_ HGKEELRFPRGQGVPIINTNS 79
Bat-SL-CoVZXC21   59_ HGKENLTFPRGQGVPIINTNS 78
Bat-SL-CoVZC45    59_ HGKENLTFPRGQGVPIINTNS 78
RaTG13            59_ HGKEDLKFPRGQGVPIINTNS 78
SARS-CoV-2        59_ HGKEDLKFPRGQGVPIINTNS 78
***: * *****
```

### **uBCEL-N3**

```
SARS-CoV          136_ tegalntpkdhigtrnpnnaatVLQLPQGTTLPKG 171
Bat-SL-CoVZXC21   135_ tegalntpkdhigtrnpannaaiVLQLPQGTTLPKG 170
Bat-SL-CoVZC45    135_ tegalntpkdhigtrnpannaaiVLQLPQGTTLPKG 170
RaTG13            135_ tegalntpkdhigtrnpannaaiVLQLPQGTTLPKG 170
SARS-CoV-2        135_ tegalntpkdhigtrnpannaaiVLQLPQGTTLPKG 170
***** *****
```

### **uBCEL-N4**

```
SARS-CoV          174_ AEGSRGGSQASSRSSRSRGNSSRNSTPGSSRGNSPArmasg 214
Bat-SL-CoVZXC21   173_ AEGSRGGSQASSRSSRSRNSSRNSTPGSSRGTSPArmagn 213
Bat-SL-CoVZC45    173_ AEGSRGGSQASSRSSRSRNSSRNSTPGSSRGTSPArmagn 213
RaTG13            173_ AEGSRGGSQASSRSSRSRNSSRNSTPGSSRGTSPArmagn 213
SARS-CoV-2        173_ AEGSRGGSQASSRSSRSRNSSRNSTPGSSRGTSPArmagn 213
***** .***** .***** .
```

### **uBCEL-N5**

```
SARS-CoV          236_ SGKGOQQGQTVT 248
Bat-SL-CoVZXC21   235_ SGKGOQQGQTVT 247
Bat-SL-CoVZC45    235_ SGKGOQQGQTVT 247
RaTG13            235_ SGKGOQQGQTVT 247
SARS-CoV-2        235_ SGKGOQQGQTVT 247
***** .****
```

**uBCEL-N6**

|                   |     |              |     |
|-------------------|-----|--------------|-----|
| <b>SARS-CoV</b>   | 277 | RRGPEQTQGNFG | 288 |
| Bat-SL-CoVZXC21   | 276 | RRGPEQTQGNFG | 287 |
| Bat-SL-CoVZC45    | 276 | RRGPEQTQGNFG | 287 |
| RaTG13            | 276 | RRGPEQTQGNFG | 287 |
| <b>SARS-CoV-2</b> | 276 | RRGPEQTQGNFG | 287 |

\*\*\*\*\*

**uBCEL-N7**

|                   |     |        |     |
|-------------------|-----|--------|-----|
| <b>SARS-CoV</b>   | 340 | LDDKDP | 345 |
| Bat-SL-CoVZXC21   | 339 | LDDKDP | 344 |
| Bat-SL-CoVZC45    | 339 | LDDKDP | 344 |
| RaTG13            | 339 | LDDKDP | 344 |
| <b>SARS-CoV-2</b> | 339 | LDDKDP | 344 |

\*\*\*\*\*

**uBCEL-N8**

|                   |     |                        |     |
|-------------------|-----|------------------------|-----|
| <b>SARS-CoV</b>   | 363 | FPPTPEPKKDKKKKTDEAQLP  | 383 |
| Bat-SL-CoVZXC21   | 363 | FPPTPEPKKDKKKKADELQALP | 383 |
| Bat-SL-CoVZC45    | 363 | FPPTPEPKKDKKKKADELQALP | 383 |
| RaTG13            | 363 | FPPTPEPKKDKKKKADETQALP | 383 |
| <b>SARS-CoV-2</b> | 363 | FPPTPEPKKDKKKKADETQALP | 383 |

\*\*\*\*\*: \*\* \* \*\*



**Supplementary Table S1. References for databases and methods utilized in this study.**

| <b>Method/database</b> | <b>Application</b>                   | <b>Reference</b> |
|------------------------|--------------------------------------|------------------|
| AAPPred                | Prediction of linear B-cell epitopes | [1]              |
| ABCPred                | Prediction of linear B-cell epitopes | [2]              |
| Bepipred               | Prediction of linear B-cell epitopes | [3]              |
| Bepipred 2.0           | Prediction of linear B-cell epitopes | [4]              |
| BLAST                  | Sequence database searching          | [5]              |
| CD-HIT 4.8.1           | Sequence clustering                  | [6]              |
| Clustal Omega 1.2.4    | Sequence alignment                   | [7]              |
| COILS                  | Prediction of coiled-coil regions    | [8]              |
| DISOPRED 3.1           | Prediction of disordered regions     | [9]              |
| Emini                  | Prediction of accessibility          | [10]             |
| IUPRED2                | Prediction of unstructured regions   | [11]             |
| Janin                  | Prediction of exposed surface        | [12]             |
| Karplus                | Prediction of flexibility            | [13]             |
| Kolaskar               | Prediction of antigenicity           | [14]             |
| LBEEP                  | Prediction of linear B-cell epitopes | [15]             |

|                   |                                            |         |
|-------------------|--------------------------------------------|---------|
| Mega 7            | Environment for phylogeny analysis         | [16]    |
| NCBI              | Sequence database for searching            | [17]    |
| Neighbor-Joining  | Calculation of phylogeny                   | [18]    |
| NetMHCpan EL 4.0  | Prediction of HLA-1 epitopes               | [19]    |
| NetMHCIIpan 3.2   | Prediction of HLA-2 epitopes               | [20]    |
| Parker            | Prediction of hydrophilicity               | [21]    |
| Pellenquer        | Prediction of turns                        | [22]    |
| Pfam 32.0         | Identification of protein domains          | [23]    |
| Phobius           | Prediction of transmembrane helices        | [24]    |
| Poison correction | Calculation of phylogenetic branch lengths | [25]    |
| Ponnuswamy        | Prediction of polarity                     | [26,27] |
| PSI-PRED 4.0      | Prediction of secondary structure          | [27]    |
| SDPPred           | Identification of SDPs                     | [28]    |
| SignalP 5.0       | Prediction of signal peptide               | [29]    |
| SVMtrip           | Prediction of linear B-cell epitopes       | [30]    |

**Supplementary Table S2.** Linear B-cell epitopes identified in spike (S), envelope (E), membrane (M), and nucleocapsid (N) proteins of SARS-CoV and SARS-CoV-2 that have been validated *in vivo*.

| Structural proteins and subunits |   |         | Epitope             |                             | Coronavirus                   | Experiment type                                       | Experimental evidence                                                              | Reference        |                                                                                            |      |
|----------------------------------|---|---------|---------------------|-----------------------------|-------------------------------|-------------------------------------------------------|------------------------------------------------------------------------------------|------------------|--------------------------------------------------------------------------------------------|------|
|                                  |   |         | Location (residues) | Sequence                    |                               |                                                       |                                                                                    |                  |                                                                                            |      |
| S                                | S | S       | 357-365             | RISNCVADY                   | SARS-CoV-2                    | <i>In silico</i>                                      | Not tested                                                                         | [31]             |                                                                                            |      |
|                                  |   |         | 361-369             | CVADYSVLY                   |                               |                                                       |                                                                                    |                  |                                                                                            |      |
|                                  |   | 1       | 1                   | 369-391                     | YNSASFSTFKCYGVSP TK<br>LNDLCF | SARS-CoV-2                                            | <i>In vitro</i>                                                                    | Not tested       | [32]                                                                                       |      |
|                                  |   |         |                     | 424-437                     | KLPDDFTGCVIAWN                | SARS-CoV-2                                            | <i>In silico</i>                                                                   | Not tested       | [33]                                                                                       |      |
|                                  |   | 447-458 | NYNLYRLFRK          |                             |                               |                                                       |                                                                                    |                  |                                                                                            |      |
|                                  |   | B       | B                   | 92-96                       | ASTEK                         | SARS-CoV-2                                            | <i>In silico</i>                                                                   | Not tested       | [34]                                                                                       |      |
|                                  |   |         |                     | 110-115                     | LDSKTQ                        |                                                       |                                                                                    |                  |                                                                                            |      |
|                                  |   |         |                     | 352-357                     | AWNRKR                        |                                                       |                                                                                    |                  |                                                                                            |      |
|                                  |   |         |                     |                             | 373-390                       | SFSTFKCYGVSP TKLNDL                                   | SARS-CoV-2                                                                         | <i>In silico</i> | Not tested                                                                                 | [35] |
|                                  |   |         |                     |                             | 434-467                       | GNYNKYRYLRHGKLRP<br>FERDISNVPFSPDGKPC                 | SARS-CoV                                                                           | <i>In vitro</i>  | Sera contain neutralizing IgG antibody against peptides                                    | [36] |
|                                  |   |         |                     |                             | 460-476                       | FSPDGK PCTPPALNCYW                                    | SARS-CoV                                                                           | <i>In vitro</i>  | Monoclonal antibodies which neutralize the virus <i>in vitro</i>                           | [37] |
|                                  |   |         |                     |                             | 337-360                       | VYAWERKKISNCVADYS<br>VLYNSTF                          | SARS-CoV                                                                           | <i>In vitro</i>  | Construction of mimotopes that reveal key amino acid residues involved in antibody binding | [38] |
|                                  |   |         |                     |                             | 380-399                       | SNVYADSFVVKGDDVRQ<br>IAP                              |                                                                                    |                  |                                                                                            |      |
|                                  |   |         |                     |                             | 491-510                       | YQP YRVVLSFELLNAPA<br>TV                              | SARS-CoV                                                                           | <i>In vitro</i>  | Epitope recognized by monoclonal antibodies with virus neutralizing activity               | [39] |
|                                  |   |         | 437-459             | NYKYRYLRHGKLRPFER<br>DISNVP | SARS-CoV                      | <i>In silico</i><br><i>in vitro</i><br><i>in vivo</i> | Induction of cellular and humoral responses. Epitope recognized by polyclonal sera | [40]             |                                                                                            |      |

|         |                                      |                               |                                     |                                                                                                                                            |                                                                                                        |           |      |
|---------|--------------------------------------|-------------------------------|-------------------------------------|--------------------------------------------------------------------------------------------------------------------------------------------|--------------------------------------------------------------------------------------------------------|-----------|------|
|         |                                      | 336-352                       | SVYAWERKKISNCVADY                   | SARS-CoV                                                                                                                                   | <i>In silico</i>                                                                                       | No tested | [41] |
|         |                                      | 424-435                       | NTRNIDATSTGN                        |                                                                                                                                            |                                                                                                        |           |      |
|         |                                      | 442-458                       | YLKHGKLRPFERDISNV                   |                                                                                                                                            |                                                                                                        |           |      |
|         |                                      | 459-470                       | PFSPDGKPCTPP                        |                                                                                                                                            |                                                                                                        |           |      |
|         |                                      | 483-494                       | FYTTTGIGYQPY                        |                                                                                                                                            |                                                                                                        |           |      |
|         | 424-435                              | NTRNIDATSTGN                  | SARS-CoV                            | <i>In silico</i><br><i>in vitro</i><br><i>in vivo</i>                                                                                      | Peptide recognized by antibodies in sera                                                               | [42]      |      |
|         | 536-552                              | GVLTPSSKRFQPFQFG              | SARS-CoV                            | <i>In vitro</i><br><i>in vivo</i>                                                                                                          | Immunized mice produce antibodies with neutralizing activity                                           | [43]      |      |
|         | 335-352                              | SVYAWERKKISNCVADY             | SARS-CoV                            | <i>In vitro</i>                                                                                                                            | Neutralizing antibodies that recognized epitopes in the RBD                                            | [44]      |      |
|         | 442-458                              | YLRHGKLRPFERDISNV             |                                     |                                                                                                                                            |                                                                                                        |           |      |
|         | 430-454                              | ATSTGNYNKYRYLRHG<br>KLRPFERD  | SARS-CoV                            | <i>In silico</i><br><i>in vitro</i>                                                                                                        | Antigen recognized by monoclonal antibody                                                              | [45]      |      |
|         | 447-458                              | LRPFERDISNV                   | SARS-CoV                            | <i>In silico</i><br><i>in vitro</i>                                                                                                        | Predicted epitope recognized by monoclonal antibody <i>in vitro</i>                                    | [46]      |      |
|         | 343-367                              | KKISNCVADYSVLYNSTF<br>FSTFKCY | SARS-CoV                            | <i>In vitro</i><br><i>in vivo</i>                                                                                                          | Antigen recognized by antibodies with virus neutralizing activity                                      | [47]      |      |
|         | 373-390                              | KLNDLCFSNVYADSFVV<br>K        |                                     |                                                                                                                                            |                                                                                                        |           |      |
|         | 411-428                              | KLPDDFMGCVLAWNTRN<br>I        |                                     |                                                                                                                                            |                                                                                                        |           |      |
|         | 323-334                              | CPFGEVFNATKF                  | SARS-CoV                            | <i>In vitro</i>                                                                                                                            | Convalescent sera with high neutralizing activity against SARS-CoV recognized epitopes in the peptides | [48]      |      |
| 467-480 | CTPPALNCYWPLND                       |                               |                                     |                                                                                                                                            |                                                                                                        |           |      |
| 471-503 | ALNCYWPLNDYGFYTTT<br>GIGYQPYRVVLSFEL | SARS-CoV-2                    | <i>In silico</i><br><i>in vitro</i> | Antibodies against a peptide located in the receptor binding domain block binding and entrance of SARS-CoV into host cells <i>in vitro</i> | [49]                                                                                                   |           |      |
| 287-317 | DAVDCALDPLSETKCTLK<br>SFTVEKGIYQTSN  | SARS-CoV-2                    | <i>In silico</i>                    | Not tested                                                                                                                                 | [50]                                                                                                   |           |      |

|          |  |           |                                                                                              |            |                                     |                                                                                                        |      |
|----------|--|-----------|----------------------------------------------------------------------------------------------|------------|-------------------------------------|--------------------------------------------------------------------------------------------------------|------|
|          |  | 524-598   | VCGPKKSTNLVKNKCVN<br>FNFNGLTGTGVLTESNKK<br>FLPFQQFGRDIADTTDAV<br>RDPQTLLEILDITPCSFGGV<br>SVI |            |                                     |                                                                                                        |      |
|          |  | 815-823   | RSFIEDLLF                                                                                    | SARS-CoV-2 | <i>In silico</i>                    | Not tested                                                                                             | [31] |
|          |  | 1039-1047 | RVDFCGKGY                                                                                    |            |                                     |                                                                                                        |      |
|          |  | 1237-1245 | MTSCCCLK                                                                                     |            |                                     |                                                                                                        |      |
|          |  | 1264-1272 | VLKGVKLHY                                                                                    |            |                                     |                                                                                                        |      |
|          |  | 144-153   | YYHKNNKSWM                                                                                   | SARS-CoV-2 | <i>In silico</i>                    | Not tested                                                                                             | [34] |
|          |  | 277-283   | KYNENGT                                                                                      |            |                                     |                                                                                                        |      |
|          |  | 15-30     | CVNLTTTRTQLPPAYTN                                                                            | SARS-CoV-2 | <i>In silico</i>                    | Not tested                                                                                             | [35] |
|          |  | 61-76     | NVTWFHAIHVSGTNGT                                                                             |            |                                     |                                                                                                        |      |
|          |  | 175-201   | KSGNFKHLREFVFKNKD<br>GFLYVYKGY                                                               | SARS-CoV   | <i>In vitro</i>                     | Sera contain neutralizing IgG against peptides                                                         | [36] |
|          |  | 174-195   | EKSGNFKHLREFVFKNK<br>DGFLY                                                                   | SARS-CoV   | <i>In silico</i><br><i>in vitro</i> | Induction of cellular and humoral responses. Epitope recognized by polyclonal sera                     | [40] |
|          |  | 91-102    | ATEKSNVVRGWV                                                                                 |            |                                     |                                                                                                        |      |
|          |  | 291-308   | KSFEIDKGIYQTSNFRVV                                                                           | SARS-CoV   | <i>In vitro</i><br><i>in vivo</i>   | Inoculation induces IgG and IgA in mice that exhibit potent neutralizing activity against SARS-CoV     | [51] |
|          |  | 130-150   | FELCDNPFFAVSKPMGTQ<br>THT                                                                    | SARS-CoV   | <i>In vitro</i>                     | Antibodies block the binding of S protein to Vero E6 cells                                             | [52] |
|          |  | 49-62     | SDTLYLTQDLFLPF                                                                               | SARS-CoV   | <i>In vitro</i>                     | Convalescent sera with high neutralizing activity against SARS-CoV recognized epitopes in the peptides | [48] |
|          |  | 295-306   | IDKGIYQTSNFR                                                                                 |            |                                     |                                                                                                        |      |
| <b>S</b> |  | 601-640   | GTNTSNQVAVLYQDVNC<br>TEVPVAIHADQLTPTWRV<br>YSTGS                                             | SARS-CoV-2 | <i>In silico</i>                    | Not tested                                                                                             | [21] |
|          |  | 802-819   | FSQILPDPSKPSKRSFIE                                                                           |            |                                     |                                                                                                        |      |

|           |                                         |                                                     |                                                       |                                                                                    |                                                                                                                       |      |
|-----------|-----------------------------------------|-----------------------------------------------------|-------------------------------------------------------|------------------------------------------------------------------------------------|-----------------------------------------------------------------------------------------------------------------------|------|
| 2         | 888-909                                 | FGAG<br>LQIPFAMQMAYRFNG                             |                                                       |                                                                                    |                                                                                                                       |      |
|           | 814-826                                 | KRSFIEDLLFNKV                                       | SARS-CoV-2                                            | <i>In silico</i>                                                                   | Not tested                                                                                                            | [53] |
|           | 560-571                                 | LPFQQFGRDIAD                                        | SARS-CoV-2                                            | <i>In silico</i>                                                                   | Not tested                                                                                                            | [33] |
|           | 754-764                                 | LQYGSFCTQLN                                         |                                                       |                                                                                    |                                                                                                                       |      |
|           | 789-799                                 | YKTPPIKDFGG                                         |                                                       |                                                                                    |                                                                                                                       |      |
|           | 1139-1152                               | DPLQPELDSFKEEL                                      |                                                       |                                                                                    |                                                                                                                       |      |
|           | 527-530                                 | PKKS                                                | SARS-CoV-2                                            | <i>In silico</i>                                                                   | Not tested                                                                                                            | [34] |
|           | 601-606                                 | GTNTSN                                              |                                                       |                                                                                    |                                                                                                                       |      |
|           | 689-700                                 | YQTQTNSPRRAR                                        |                                                       |                                                                                    |                                                                                                                       |      |
|           | 771-779                                 | EQDKNTQ                                             |                                                       |                                                                                    |                                                                                                                       |      |
|           | 1154-1162                               | KYFKNHTSP                                           |                                                       |                                                                                    |                                                                                                                       |      |
|           | 1141-1184                               | LQPELDSFKEELDKYFKN<br>HTSPDVLGDISGINASV<br>VNIQKEID | SARS-CoV-2                                            | <i>In vitro</i>                                                                    | Neutralizing antibodies recognize the S2 domain of S protein and confers protection against a wide range of SARS-CoVs | [54] |
|           | 1128-1159                               | DSFKEELDKYFKNHTSPD<br>VDLGDISGINASVV                |                                                       |                                                                                    |                                                                                                                       |      |
|           | 958-966                                 | VLNDILSRL                                           | SARS-CoV                                              | <i>In vitro</i>                                                                    | Sera contained neutralizing IgG antibody against peptides                                                             | [36] |
|           | 1156-1178                               | ASVVNIQKEIDRLNEVAK<br>NLNES                         | SARS-CoV                                              | <i>In silico</i><br><i>in vitro</i><br><i>in vivo</i>                              | Sera from vaccinated mice contain IgG that exhibit virus neutralization activity                                      | [55] |
| 556-568   | SDFTDSVRDPKTS                           | SARS-CoV                                            | <i>In silico</i><br><i>in vitro</i>                   | Induction of cellular and humoral responses. Epitope recognized by polyclonal sera | [40]                                                                                                                  |      |
| 915-949   | QIQESLTTTSTALGKLQD<br>VVNQNAQALNTLVKQLS | SARS-CoV                                            | <i>In silico</i>                                      | Not tested                                                                         | [41]                                                                                                                  |      |
| 1150-1184 | ISGINASVVNIQKEIDRLN<br>EVAKNLNESLIDLQE  |                                                     |                                                       |                                                                                    |                                                                                                                       |      |
| 1065-1076 | HEGKAYFPREGV                            | SARS-CoV                                            | <i>In silico</i><br><i>in vitro</i><br><i>in vivo</i> | Peptide recognized by antibodies in sera                                           | [56]                                                                                                                  |      |
| 520-537   | IKNQCVMFNFNGLTGTGV                      | SARS-CoV                                            | <i>In vitro</i>                                       | Inoculation in mice induces IgG                                                    | [51]                                                                                                                  |      |

|           |                                                                                                                            |          |                                           |                                                                                                |      |
|-----------|----------------------------------------------------------------------------------------------------------------------------|----------|-------------------------------------------|------------------------------------------------------------------------------------------------|------|
| 564-581   | DPKTSEILDISPCSFGGV                                                                                                         |          | <i>in vivo</i>                            | and IgA that exhibit a potent neutralizing activity against SARS-CoV                           |      |
| 540-554   | PSSKRFQPFQQFGRD                                                                                                            | SARS-CoV | <i>In silico<br/>in vitro</i>             | Peptides at the N- the C-terminal regions of the N protein elicited strong antibody responses. | [57] |
| 553-570   | RDVSDFTDSVRDPKTSEI                                                                                                         |          |                                           |                                                                                                |      |
| 1236-1255 | CKFDEDDSEPVLKGVKL<br>HYT                                                                                                   |          |                                           |                                                                                                |      |
| 1091-     | NFFSPQIITDNTFVSGNC<br>DVVIGIINNTVYDPLQPEL<br>DSFKEELDKYFKNHTSPD<br>VDLGDISGINASVVNIQK<br>EIDRLNEVAKNLNESLID<br>LQELGKYEQYI | SARS-CoV | <i>In vitro</i>                           | Antibodies recognized HR2 domain and neutralize virus infection <i>in vitro</i>                | [58] |
| 1143-1157 | SPDVDLGDISGINAS                                                                                                            | SARS-CoV | <i>In vitro</i>                           | Antibodies recognized HR2 domain                                                               | [59] |
| 539-559   | TPSSKRFQPFQQFGRDVS<br>DFT                                                                                                  | SARS-CoV | <i>In vitro</i>                           | Four epitopes in S1 domain induce a humoral response in mice                                   | [60] |
| 548-567   | FQQFGRDVSDFTDSVRDP<br>KT                                                                                                   |          |                                           |                                                                                                |      |
| 583-606   | VITPGTNASSEVAVLYQD<br>VNCTDV                                                                                               |          |                                           |                                                                                                |      |
| 607-630   | STAIHADQLTPAWRIYST<br>GNNVFQ                                                                                               |          |                                           |                                                                                                |      |
| 927-937   | GLGKLQDVVNQNGE                                                                                                             | SARS-CoV | <i>In vitro</i>                           | Antibodies recognized SARS-CoV                                                                 | [61] |
| 942-951   | ALNTLVKQLSSNC                                                                                                              |          |                                           |                                                                                                |      |
| 789-799   | PDPLKPTKRSF                                                                                                                | SARS-CoV | <i>In silico<br/>in vitro</i>             | Epitope recognized by monoclonal antibody                                                      | [46] |
| 540-559   | PSSKRFQPFQQFGRDVSD<br>FT                                                                                                   | SARS-CoV | <i>In silico<br/>in vitro<br/>in vivo</i> | Antibodies without neutralizing activity but inhibit syncytia formation                        | [62] |
| 731-753   | CANLLLQYGSFCTQLNR<br>ALSGIA                                                                                                |          |                                           |                                                                                                |      |
| 786-811   | QILPDPLKPTKRSFIEDLL<br>FNKVTLA                                                                                             | SARS-CoV | <i>In vitro</i>                           | Convalescent sera recognize S2 domain                                                          | [63] |
| 490-510   | GYQPYRVVLSFELLNAP                                                                                                          | SARS-CoV | <i>In vitro</i>                           | Antibodies block the binding of S                                                              | [52] |



|  |           |                            |          |                                     |                                                                                                                        |      |
|--|-----------|----------------------------|----------|-------------------------------------|------------------------------------------------------------------------------------------------------------------------|------|
|  |           | AT                         |          |                                     | protein to Vero E6 cells                                                                                               |      |
|  | 599-620   | QDVNCTDVSTAIHADQL<br>TPAWR | SARS-CoV | <i>In silico</i><br><i>in vitro</i> | Sera from patients with SARS-CoV react with peptides                                                                   | [64] |
|  | 947-965   | QLSSNFGAISSVLNDILSR        |          |                                     |                                                                                                                        |      |
|  | 607-627   | STAIHADQLTPAWRIYST<br>GN   | SARS-CoV | <i>In vitro</i>                     | Peptide recognized by monoclonal antibodies which neutralize SARS-CoV                                                  | [65] |
|  | 599-620   | QDVNCTDVSTAIHADQL<br>TPAWR | SARS-CoV | <i>In silico</i><br><i>in vitro</i> | Peptide recognized by antibodies in sera                                                                               | [66] |
|  | 597-603   | LYQDVNC                    | SARS-CoV | <i>In vitro</i>                     | Immunization with this peptide induces antibodies that enhance infection both <i>in vitro</i> and in non-human primate | [67] |
|  | 731-745   | CANLLLQYGSFCTQL            | SARS-CoV | <i>In vitro</i><br><i>in vivo</i>   | Antibodies recognize the cleavage site critical for SARS-CoV entry into host cells                                     | [68] |
|  | 545-558   | FQPFQQFGRDVSDF             | SARS-CoV | <i>In vitro</i>                     | Convalescent sera with high neutralizing activity against SARS-CoV recognized epitopes in the peptides                 | [48] |
|  | 553-564   | RDVSDFTDSVRD               |          |                                     |                                                                                                                        |      |
|  | 651-662   | PIGAGICASYHT               |          |                                     |                                                                                                                        |      |
|  | 663-674   | VSLLRSTSQKSI               |          |                                     |                                                                                                                        |      |
|  | 695-708   | AIPTNFSISITTEV             |          |                                     |                                                                                                                        |      |
|  | 737-748   | QYGSFCTQLNRA               |          |                                     |                                                                                                                        |      |
|  | 879-890   | PFAMQMAYRFNG               |          |                                     |                                                                                                                        |      |
|  | 791-805   | PLKPTKRSFIEDLLF            | SARS-CoV | <i>In vitro</i>                     | Peptides recognized by convalescent sera                                                                               | [69] |
|  | 1111-1130 | VIGVINNTVYDPLQPELDSF       | SARS-CoV | <i>In vitro</i>                     | Peptide recognized by neutralizing antibody that prevents viral                                                        | [70] |
|  | 60-76     | SRVKNLNSSEGVPDLLV          | SARS-CoV | <i>In silico</i><br><i>in vitro</i> | Peptides elicit antibody responses                                                                                     | [57] |

|          |                           |                                                        |                                     |                                                       |                                                                                                        |      |
|----------|---------------------------|--------------------------------------------------------|-------------------------------------|-------------------------------------------------------|--------------------------------------------------------------------------------------------------------|------|
| <b>E</b> | 55-70                     | TVYVYSRVKLNLSSEG                                       | SARS-CoV                            | <i>In vitro</i>                                       | Convalescent sera with high neutralizing activity against SARS-CoV recognized epitopes in the peptides | [48] |
| <b>M</b> | 1-24                      | MADNNGTITVEELKKLLE<br>QWNLVI                           | SARS-CoV-2                          | <i>In silico</i>                                      | No tested                                                                                              | [50] |
|          | 132-151                   | PLLESELVIGAVILRGHLR<br>I                               |                                     |                                                       |                                                                                                        |      |
|          | 1-31                      | MADNNGTITVEELKQLLEQ<br>WNLVIGFLFLAWI                   | SARS-CoV                            | <i>In silico</i><br><i>in vitro</i>                   | Peptides react with convalescent sera and induce high antibody titers in rabbits                       | [44] |
|          | 132-161                   | LMESELVIGAVIIRGHLR<br>MAGHSLGRCDIK                     |                                     |                                                       |                                                                                                        |      |
|          | 1-20                      | MADNNGTITVEELKQLLEQ<br>WN                              | SARS-CoV                            | <i>In silico</i><br><i>in vitro</i>                   | Peptide recognized by monoclonal antibody                                                              | [40] |
|          | 149-163                   | RMAGHSLGRCDIKDLP                                       | SARS-CoV                            | <i>In silico</i><br><i>in vitro</i><br><i>in vivo</i> | Peptide recognized by monoclonal antibody                                                              | [42] |
|          | 173-185                   | PKEITVATSRTLS                                          |                                     |                                                       |                                                                                                        |      |
|          | 204-221                   | KLNTDHAGSNDNIALLV<br>Q                                 |                                     |                                                       |                                                                                                        |      |
|          | 1-18                      | MADNNGTITVEELKQLLEQ                                    | SARS-CoV                            | <i>In silico</i><br><i>in vitro</i>                   | Peptides elicit an antibody response                                                                   | [57] |
|          | 1-15                      | MADNNGTITVEELKQL                                       | SARS-CoV                            | <i>In vitro</i>                                       | Recognition by convalescent sera                                                                       | [71] |
|          | 165-176                   | KEITVATSRTLS                                           | SARS-CoV                            | <i>In vitro</i>                                       | Convalescent sera with high neutralizing activity against SARS-CoV recognized epitopes in the peptides | [48] |
| 5-16     | GTITVEELKQLL              |                                                        |                                     |                                                       |                                                                                                        |      |
| 137-158  | LVIGAVIIRGHLRMAGHS<br>LGR | SARS-CoV                                               | <i>In silico</i><br><i>in vitro</i> | Peptide recognized by antibodies in sera              | [66]                                                                                                   |      |
| <b>N</b> | 42-62                     | RPQGLPNNTASWFTALT<br>QH GK                             | SARS-CoV-2                          | <i>In silico</i>                                      | Not tested                                                                                             | [50] |
|          | 153-172                   | NNN<br>TVLQLPQGTTLPKGF                                 |                                     |                                                       |                                                                                                        |      |
|          | 355-401                   | NKHIDAYKTFPPTEPKKD<br>KKKKTDEAQPLPQRQKK<br>QPTVTLLP DM |                                     |                                                       |                                                                                                        |      |

|         |                                    |          |                               |                                                                        |      |
|---------|------------------------------------|----------|-------------------------------|------------------------------------------------------------------------|------|
| 111-125 | FYYLGTGPEASLPYG                    | SARS-CoV | <i>In vitro</i>               | Peptide reacts with sera from mouse, rat, rabbit, civet, pig and horse | [72] |
| 1-17    | MSDNGPQSNQRSAPRIT                  | SARS-CoV | <i>In silico<br/>in vitro</i> | Peptides elicit antibody responses                                     | [57] |
| 13-30   | APRITFGGPTDSTDNNQN                 |          |                               |                                                                        |      |
| 25-43   | TDNNQNGGRNGARPKQR<br>RP            |          |                               |                                                                        |      |
| 38-55   | PKQRRPQGLPNNIASWFT                 |          |                               |                                                                        |      |
| 341-360 | DDKDPQFKDNVILLNKHI<br>DA           |          |                               |                                                                        |      |
| 356-375 | KHIDAYKTFPPTPKKDK<br>KK            |          |                               |                                                                        |      |
| 371-390 | KDKKKKTDEAQPLPQRQ<br>KKQ           |          |                               |                                                                        |      |
| 11-19   | RSAPRITF                           | SARS-CoV | <i>In vitro</i>               | Antibody binding in phage library screen                               | [73] |
| 17-32   | TFGGPTDSTDNNQNGG                   | SARS-CoV | <i>In vitro</i>               | Peptides recognized by antibodies                                      | [74] |
| 135-150 | ATEGALNTPKDHIGTR                   |          |                               |                                                                        |      |
| 117-132 | GPEASLPYGANKEGIV                   |          |                               |                                                                        |      |
| 215-239 | GGETALALLLDRLNQL<br>SKVSGKG        |          |                               |                                                                        |      |
| 245-268 | QTVTKKS<br>EASKKPRQKRTATKQ         |          |                               |                                                                        |      |
| 274-283 | AFGRRGPEQT                         | SARS-CoV | <i>In vitro</i>               | Monoclonal antibodies recognized epitopes                              | [75] |
| 286-295 | NFGDQDLIRQ                         |          |                               |                                                                        |      |
| 316-325 | FGMSRIGMEV                         |          |                               |                                                                        |      |
| 361-367 | YKTFPPT                            |          |                               |                                                                        |      |
| 1-30    | MSDNGPQSNQRSAPRITF<br>GGPTDSTDNNQN | SARS-CoV | <i>In vitro</i>               | Peptide recognition by antibodies                                      | [76] |
| 81-95   | PDDQIGYYRRATRRV                    |          |                               |                                                                        |      |
| 86-100  | GYRRATRRVRGGDG                     |          |                               |                                                                        |      |
| 156-175 | TVLQLPQGTTLPK                      |          |                               |                                                                        |      |
| 300-320 | HWPQIAQFAPSASAFFGM                 |          |                               |                                                                        |      |

|         |                                                                                   |          |                               |                                                                                                           |      |
|---------|-----------------------------------------------------------------------------------|----------|-------------------------------|-----------------------------------------------------------------------------------------------------------|------|
|         | SR                                                                                |          |                               |                                                                                                           |      |
| 336-350 | GAIKLDDKDPQFKDN                                                                   |          |                               |                                                                                                           |      |
| 351-365 | VILLNKHIDAYKTFP                                                                   |          |                               |                                                                                                           |      |
| 1-69    | MSDNGPQSNQRSAPRITF<br>GGPTDSTDNNQNGGRNG<br>ARPKQRRPQGLPNNIASW<br>FTALTQHGKEELRFPR | SARS-CoV | <i>In vitro</i>               | Recognition by monoclonal antibodies                                                                      | [77] |
| 1-20    | MSDNGPQSNQRSAPRITF<br>GG                                                          | SARS-CoV | <i>In vitro</i>               | Peptides react with convalescent sera. Antibody production after peptide immunization                     | [78] |
| 150-170 | RNPNNNTVLQLPQGTTLP<br>K                                                           |          |                               |                                                                                                           |      |
| 390-410 | QPTVTLLPDMDDFSRQLQ<br>N                                                           |          |                               |                                                                                                           |      |
| 371-390 | KDKKKKTDEAQPLPQRQ<br>KKQ                                                          | SARS-CoV |                               | Peptides react with convalescent sera                                                                     | [79] |
| 385-407 | QRQKKQPTVTLLP<br>DMDDFSRQ                                                         |          |                               |                                                                                                           |      |
| 52-59   | SWFTALTQ                                                                          | SARS-CoV | <i>In silico<br/>in vitro</i> | Synthetic peptides react with convalescent sera and antisera from mice immunized with inactivate SARS-CoV | [80] |
| 83-89   | DQIGYYR                                                                           |          |                               |                                                                                                           |      |
| 156-166 | TVLQLPQGT                                                                         |          |                               |                                                                                                           |      |
| 218-227 | TALALLLLDR                                                                        |          |                               |                                                                                                           |      |
| 347-363 | FKDNVILLNKHIDAYKT                                                                 |          |                               |                                                                                                           |      |
| 379-385 | EAQPLPQ                                                                           |          |                               |                                                                                                           |      |
| 389-398 | KQPTVTLLPA                                                                        |          |                               |                                                                                                           |      |
| 66-87   | QLPQGTTLPKGFYAEGSR<br>GGSQ                                                        | SARS-CoV | <i>In silico<br/>in vitro</i> | Peptide recognized by antibodies in sera                                                                  | [66] |
| 371-390 | KDKKKKTDEAQPLPQRQ<br>KKQ                                                          |          |                               |                                                                                                           |      |

Abbreviations:

<sup>a</sup> IEDB: Immune Epitope Database

<sup>b</sup> PISA: Proteins, Interfaces, Structures and Assemblies

<sup>c</sup> ViPR: Virus Pathogen Database and Analysis Resource

## REFERENCES

1. Davydov Ia, I.; Tonevitskii, A.G. Linear B-cell epitope prediction. *Mol Biol* **2009**, *43*, 166-174.
2. Saha, S.; Raghava, G.P. Prediction of continuous B-cell epitopes in an antigen using recurrent neural network. *Proteins* **2006**, *65*, 40-48.
3. Larsen, J.E.; Lund, O.; Nielsen, M. Improved method for predicting linear B-cell epitopes. *Immunome Res* **2006**, *2*, 1745-7580.
4. Jespersen, M.C.; Peters, B.; Nielsen, M.; Marcatili, P. BepiPred-2.0: improving sequence-based B-cell epitope prediction using conformational epitopes. *Nucleic Acids Res* **2017**, *45*, W24-W29.
5. Altschul, S.F.; Gish, W.; Miller, W.; Myers, E.W.; Lipman, D.J. Basic local alignment search tool. *J Mol Biol* **1990**, *215*, 403-410.
6. Fu, L.; Niu, B.; Zhu, Z.; Wu, S.; Li, W. CD-HIT: accelerated for clustering the next-generation sequencing data. *Bioinformatics* **2012**, *28*, 3150-3152.
7. Sievers, F.; Higgins, D.G. Clustal Omega for making accurate alignments of many protein sequences. *Protein Sci* **2018**, *27*, 135-145.
8. Lupas, A.; Van Dyke, M.; Stock, J. Predicting coiled coils from protein sequences. *Science* **1991**, *252*, 1162-1164.
9. Jones, D.T.; Ward, J.J. Prediction of disordered regions in proteins from position specific score matrices. *Proteins* **2003**, *6*, 573-578.
10. Emini, E.A.; Hughes, J.V.; Perlow, D.S.; Boger, J. Induction of hepatitis A virus-neutralizing antibody by a virus-specific synthetic peptide. *J Virol* **1985**, *55*, 836-839.
11. Meszaros, B.; Erdos, G.; Dosztanyi, Z. IUPred2A: context-dependent prediction of protein disorder as a function of redox state and protein binding. *Nucleic Acids Res* **2018**, *46*, W329-W337.
12. Janin, J.; Wodak, S. Conformation of amino acid side-chains in proteins. *J Mol Biol* **1978**, *125*, 357-386.
13. Karplus, P.A.; Schulz, G.E. Prediction of chain flexibility in proteins - A tool for the selection of peptide antigens. *Naturwissenschaften* **1985**, *72*, 212-213, doi:10.1007/bf01195768.
14. Kolaskar, A.S.; Tongaonkar, P.C. A semi-empirical method for prediction of antigenic determinants on protein antigens. *FEBS Lett* **1990**, *276*, 172-174.
15. Saravanan, V.; Gautham, N. Harnessing Computational Biology for Exact Linear B-Cell Epitope Prediction: A Novel Amino Acid Composition-Based Feature Descriptor. *Omics* **2015**, *19*, 648-658.
16. Kumar, S.; Stecher, G.; Tamura, K. MEGA7: Molecular Evolutionary Genetics Analysis Version 7.0 for Bigger Datasets. *Mol Biol Evol* **2016**, *33*, 1870-1874.
17. Database resources of the National Center for Biotechnology Information. *Nucleic Acids Res* **2018**, *46*, D8-D13.
18. Saitou, N.; Nei, M. The neighbor-joining method: a new method for reconstructing phylogenetic trees. *Mol Biol Evol* **1987**, *4*, 406-425.
19. Hoof, I.; Peters, B.; Sidney, J.; Pedersen, L.E.; Sette, A.; Lund, O.; Buus, S.; Nielsen, M. NetMHCpan, a method for MHC class I binding prediction beyond humans. *Immunogenetics* **2009**, *61*, 1-13, doi:10.1007/s00251-008-0341-z.

20. Jensen, K.K.; Andreatta, M.; Marcatili, P.; Buus, S.; Greenbaum, J.A.; Yan, Z.; Sette, A.; Peters, B.; Nielsen, M. Improved methods for predicting peptide binding affinity to MHC class II molecules. *Immunology* **2018**, *154*, 394-406, doi:10.1111/imm.12889.
21. Parker, J.M.; Guo, D.; Hodges, R.S. New hydrophilicity scale derived from high-performance liquid chromatography peptide retention data: correlation of predicted surface residues with antigenicity and X-ray-derived accessible sites. *Biochemistry* **1986**, *25*, 5425-5432.
22. Pellequer, J.L.; Westhof, E.; Van Regenmortel, M.H. Correlation between the location of antigenic sites and the prediction of turns in proteins. *Immunol Lett* **1993**, *36*, 83-99.
23. El-Gebali, S.; Mistry, J.; Bateman, A.; Eddy, S.R.; Luciani, A.; Potter, S.C.; Qureshi, M.; Richardson, L.J.; Salazar, G.A.; Smart, A., et al. The Pfam protein families database in 2019. *Nucleic Acids Res* **2019**, *47*, D427-D432.
24. Kall, L.; Krogh, A.; Sonnhammer, E.L. A combined transmembrane topology and signal peptide prediction method. *J Mol Biol* **2004**, *338*, 1027-1036.
25. Zuckerkandl, E.; Pauling, L. Molecules as documents of evolutionary history. *J Theor Biol* **1965**, *8*, 357-366.
26. Ponnuswamy, P.K.; Prabhakaran, M.; Manavalan, P. Hydrophobic packing and spatial arrangement of amino acid residues in globular proteins. *Biochim Biophys Acta* **1980**, *623*, 301-316.
27. Buchan, D.W.A.; Jones, D.T. The PSIPRED Protein Analysis Workbench: 20 years on. *Nucleic Acids Res* **2019**, *47*, W402-W407.
28. Kalinina, O.V.; Mironov, A.A.; Gelfand, M.S.; Rakhmaninova, A.B. Automated selection of positions determining functional specificity of proteins by comparative analysis of orthologous groups in protein families. *Protein Sci* **2004**, *13*, 443-456.
29. Almagro Armenteros, J.J.; Tsirigos, K.D.; Sonderby, C.K.; Petersen, T.N.; Winther, O.; Brunak, S.; von Heijne, G.; Nielsen, H. SignalP 5.0 improves signal peptide predictions using deep neural networks. *Nat Biotechnol* **2019**, *37*, 420-423.
30. Yao, B.; Zhang, L.; Liang, S.; Zhang, C. SVMTriP: a method to predict antigenic epitopes using support vector machine to integrate tri-peptide similarity and propensity. *PLoS One* **2012**, *7*, 12.
31. Kumar, S.; Maurya, V.K.; Prasad, A.K.; Bhatt, M.L.B.; Saxena, S.K. Structural, glycosylation and antigenic variation between 2019 novel coronavirus (2019-nCoV) and SARS coronavirus (SARS-CoV). *Virusdisease* **2020**, *31*, 13-21.
32. Yuan, M.; Wu, N.C.; Zhu, X.; Lee, C.D.; So, R.T.Y.; Lv, H.; Mok, C.K.P.; Wilson, I.A. A highly conserved cryptic epitope in the receptor-binding domains of SARS-CoV-2 and SARS-CoV. *Science* **2020**, *3*.
33. Tilocca, B.; Soggiu, A.; Musella, V.; Britti, D.; Sanguinetti, M.; Urbani, A.; Roncada, P. Molecular basis of COVID-19 relationships in different species: a one health perspective. *Microbes Infect* **2020**, *17*, 30048-30044.
34. Zheng, M.; Song, L. Novel antibody epitopes dominate the antigenicity of spike glycoprotein in SARS-CoV-2 compared to SARS-CoV. *Cell Mol Immunol* **2020**, *4*, 020-0385.
35. Baruah, V.; Bose, S. Immunoinformatics-aided identification of T cell and B cell epitopes in the surface glycoprotein of 2019-nCoV. *J Med Virol* **2020**, *92*, 495-500, doi:10.1002/jmv.25698.

36. Lien, S.P.; Shih, Y.P.; Chen, H.W.; Tsai, J.P.; Leng, C.H.; Lin, M.H.; Lin, L.H.; Liu, H.Y.; Chou, A.H.; Chang, Y.W., et al. Identification of synthetic vaccine candidates against SARS CoV infection. *Biochem Biophys Res Commun* **2007**, *358*, 716-721, doi:10.1016/j.bbrc.2007.04.164.
37. Berry, J.D.; Hay, K.; Rini, J.M.; Yu, M.; Wang, L.; Plummer, F.A.; Corbett, C.R.; Andonov, A. Neutralizing epitopes of the SARS-CoV S-protein cluster independent of repertoire, antigen structure or mAb technology. *MAbs* **2010**, *2*, 53-66.
38. Zhang, X.P.; Wang, J.X.; Wen, K.; Mou, Z.R.; Zou, L.Y.; Che, X.Y.; Ni, B.; Wu, Y.Z. Antibody Binding Site Mapping of SARS-CoV Spike Protein Receptor-Binding Domain by a Combination of Yeast Surface Display and Phage Peptide Library Screening. *Viral Immunol* **2009**, *22*, 407-415, doi:10.1089/vim.2009.0046.
39. Zhong, L.; Haynes, L.; Struble, E.B.; Tamin, A.; Virata-Theimer, M.L.; Zhang, P. Antibody-mediated synergy and interference in the neutralization of SARS-CoV at an epitope cluster on the spike protein. *Biochem Biophys Res Commun* **2009**, *390*, 1056-1060, doi:10.1016/j.bbrc.2009.10.115.
40. Wang, X.H.; Xu, W.; Tong, D.Y.; Ni, J.; Gao, H.F.; Wang, Y.; Chu, Y.W.; Li, P.P.; Yang, X.M.; Xiong, S.D. A chimeric multi-epitope DNA vaccine elicited specific antibody response against severe acute respiratory syndrome-associated coronavirus which attenuated the virulence of SARS-CoV in vitro. *Immunol Lett* **2008**, *119*, 71-77, doi:10.1016/j.imlet.2008.04.005.
41. El-Manzalawy, Y.; Dobbs, D.; Honavar, V. Predicting linear B-cell epitopes using string kernels. *J Mol Recognit* **2008**, *21*, 243-255, doi:10.1002/jmr.893.
42. Yu, H.; Jiang, L.F.; Fang, D.Y.; Yan, H.J.; Zhou, J.J.; Zhou, J.M.; Liang, Y.; Gao, Y.; Zhao, W.; Long, B.G. Selection of SARS-Coronavirus-specific B cell epitopes by phage peptide library screening and evaluation of the immunological effect of epitope-based peptides on mice. *Virology* **2007**, *359*, 264-274, doi:10.1016/j.virol.2006.09.016.
43. He, Y.X.; Li, J.J.; Heck, S.; Lustigman, S.; Jiang, S.B. Antigenic and immunogenic characterization of recombinant baculovirus-expressed severe acute respiratory syndrome coronavirus spike protein: Implication for vaccine design. *J Virol* **2006**, *80*, 5757-5767, doi:10.1128/jvi.00083-06.
44. He, Y.X.; Li, J.J.; Du, L.Y.; Yan, X.X.; Hu, G.G.; Zhou, Y.S.; Jiang, S.B. Identification and characterization of novel neutralizing epitopes in the receptor-binding domain of SARS-CoV spike protein: Revealing the critical antigenic determinants in inactivated SARS-CoV vaccine. *Vaccine* **2006**, *24*, 5498-5508, doi:10.1016/j.vaccine.2006.04.054.
45. Yu, X.F.; Liang, L.H.; She, M.; Liao, X.L.; Gu, J.; Li, Y.H.; Han, Z.C. Production of a monoclonal antibody against SARS-CoV spike protein with single intrasplenic immunization of plasmid DNA. *Immunol Lett* **2005**, *100*, 177-181, doi:10.1016/j.imlet.2005.03.015.
46. Hua, R.H.; Zhou, Y.J.; Wang, Y.F.; Hua, Y.Z.; Tong, G.Z. Identification of two antigenic epitopes on SARS-CoV spike protein. *Biochem Biophys Res Commun* **2004**, *319*, 929-935, doi:10.1016/j.bbrc.2004.05.066.
47. Bian, C.; Zhang, X.Q.; Cai, X.F.; Zhang, L.Q.; Chen, Z.W.; Zha, Y.; Xu, Y.; Xu, K.; Lu, W.; Yan, L.C., et al. Conserved amino acids W423 and N424 in receptor-binding domain of SARS-CoV are potential targets for therapeutic monoclonal antibody. *Virology* **2009**, *383*, 39-46, doi:10.1016/j.virol.2008.09.029.



48. Guo, J.P.; Petric, M.; Campbell, W.; McGeer, P.L. SARS corona virus peptides recognized by antibodies in the sera of convalescent cases. *Virology* **2004**, *324*, 251-256, doi:10.1016/j.virol.2004.04.017.
49. Hu, H.B.; Li, L.; Kao, R.Y.; Kou, B.B.; Wang, Z.G.; Zhang, L.; Zhang, H.Y.; Hao, Z.Y.; Tsui, W.H.; Ni, A.P., et al. Screening and identification of linear B-cell epitopes and entry-blocking peptide of severe acute respiratory syndrome (SARS)-associated coronavirus using synthetic overlapping peptide library. *J Comb Chem* **2005**, *7*, 648-656, doi:10.1021/cc0500607.
50. Grifoni, A.; Sidney, J.; Zhang, Y.; Scheuermann, R.H.; Peters, B.; Sette, A. A Sequence Homology and Bioinformatic Approach Can Predict Candidate Targets for Immune Responses to SARS-CoV-2. *Cell Host Microbe* **2020**, *12*, 30166-30169.
51. Lee, J.S.; Poo, H.; Han, D.P.; Hong, S.P.; Kim, K.; Cho, M.W.; Kim, E.; Sung, M.H.; Kim, C.J. Mucosal immunization with surface-displayed severe acute respiratory syndrome coronavirus spike protein on *Lactobacillus casei* induces neutralizing antibodies in mice. *J Virol* **2006**, *80*, 4079-4087, doi:10.1128/jvi.80.8.4079-4087.2006.
52. Greenough, T.C.; Babcock, G.J.; Roberts, A.; Hernandez, H.J.; Thomas, W.D.; Coccia, J.A.; Graziano, R.F.; Srinivasan, M.; Lowy, I.; Finberg, R.W., et al. Development and characterization of a severe acute respiratory syndrome-associated coronavirus-neutralizing human monoclonal antibody that provides effective immunoprophylaxis in mice. *J Infect Dis* **2005**, *191*, 507-514, doi:10.1086/427242.
53. Robson, B. Computers and viral diseases. Preliminary bioinformatics studies on the design of a synthetic vaccine and a preventative peptidomimetic antagonist against the SARS-CoV-2 (2019-nCoV, COVID-19) coronavirus. *Comput Biol Med* **2020**, *119*, 26.
54. Elshabrawy, H.A.; Coughlin, M.M.; Baker, S.C.; Prabhakar, B.S. Human Monoclonal Antibodies against Highly Conserved HR1 and HR2 Domains of the SARS-CoV Spike Protein Are More Broadly Neutralizing. *PLoS One* **2012**, *7*, doi:10.1371/journal.pone.0050366.
55. Pimentel, T.; Yan, Z.; Jeffers, S.A.; Holmes, K.V.; Hodges, R.S.; Burkhard, P. Peptide Nanoparticles as Novel Immunogens: Design and Analysis of a Prototypic Severe Acute Respiratory Syndrome Vaccine. *Chem Biol Drug Des* **2009**, *73*, 53-61, doi:10.1111/j.1747-0285.2008.00746.x.
56. Yu, H.; Jiang, L.F.; Fang, D.Y.; Yan, H.J.; Zhou, J.J.; Zhou, J.M.; Liang, Y.; Gao, Y.; Zhao, W.; Long, B.G. Selection of SARS-coronavirus-specific B cell epitopes by phage peptide library screening and evaluation of the immunological effect of epitope-based peptides on mice. *Virology* **2007**, *359*, 264-274.
57. Chow, S.C.S.; Ho, C.Y.S.; Tam, T.T.Y.; Wu, C.; Cheung, T.; Chan, P.K.S.; Ng, M.H.L.; Hui, P.K.; Ng, H.K.; Au, D.M.Y., et al. Specific epitopes of the structural and hypothetical proteins elicit variable humoral responses in SARS patients. *J Clin Pathol* **2006**, *59*, 468-476, doi:10.1136/jcp.2005.029868.
58. Lip, K.M.; Shen, S.; Yang, X.M.; Keng, C.T.; Zhang, A.H.; Oh, H.L.J.; Li, Z.H.; Hwang, L.A.; Chou, C.F.; Fielding, B.C., et al. Monoclonal antibodies targeting the HR2 domain and the region immediately upstream of the HR2 of the S protein

- neutralize in vitro infection of severe acute respiratory syndrome coronavirus. *J Virol* **2006**, *80*, 941-950, doi:10.1128/jvi.80.2.941-950.2006.
59. Lai, S.C.; Chong, P.C.S.; Yeh, C.T.; Liu, L.S.J.; Jan, J.T.; Chi, H.Y.; Liu, H.W.; Chen, A.; Wang, Y.C. Characterization of neutralizing monoclonal antibodies recognizing a 15-residues epitope on the spike protein HR2 region of severe acute respiratory syndrome coronavirus (SARS-CoV). *J Biomed Sci* **2005**, *12*, 711-727, doi:10.1007/s11373-005-9004-3.
  60. Hua, R.H.; Wang, Y.F.; Bu, Z.G.; Zhou, Y.J.; Ge, J.Y.; Wang, X.J.; Tong, G.Z. Identification and antigenic epitope mapping of immunodominant region amino residues 510 to 672 on the spike protein of the severe acute respiratory syndrome coronavirus. *DNA Cell Biol* **2005**, *24*, 503-509, doi:10.1089/dna.2005.24.503.
  61. Lin, Y.S.; Lin, C.F.; Fang, Y.T.; Kuo, Y.M.; Liao, P.C.; Yeh, T.M.; Hwa, K.Y.; Shieh, C.C.K.; Yen, J.H.; Wang, H.J., et al. Antibody to severe acute respiratory syndrome (SARS)-associated coronavirus spike protein domain 2 cross-reacts with lung epithelial cells and causes cytotoxicity. *Clin Exp Immunol* **2005**, *141*, 500-508, doi:10.1111/j.1365-2249.2005.02864.x.
  62. Lu, W.; Wu, X.D.; De Shi, M.; Yang, R.F.; He, Y.Y.; Bian, C.; Shi, T.L.; Yang, S.; Zhu, X.L.; Jiang, W.H., et al. Synthetic peptides derived from SARS coronavirus S protein with diagnostic and therapeutic potential. *FEBS Lett* **2005**, *579*, 2130-2136, doi:10.1016/j.febslet.2005.02.070.
  63. Zhong, X.F.; Yang, H.H.; Guo, Z.F.; Sin, W.Y.F.; Chen, W.; Xu, J.J.; Fu, L.; Wu, J.; Mak, C.K.G.; Cheng, C.S.S., et al. B-cell responses in patients who have recovered from severe acute respiratory syndrome target a dominant site in the S2 domain of the surface spike glycoprotein. *J Virol* **2005**, *79*, 3401-3408, doi:10.1128/jvi.79.6.3401-3408.2005.
  64. Ren, Y.; Zhou, Z.; Liu, J.; Lin, L.; Li, S.; Wang, H.; Xia, J.; Zhao, Z.; Wen, J.; Zhou, C., et al. A strategy for searching antigenic regions in the SARS-CoV spike protein. *Genom Proteom Bioinf* **2003**, *1*, 207-215.
  65. Zhou, T.; Wang, H.; Luo, D.L.; Rowe, T.; Wang, Z.; Hogan, R.J.; Qiu, S.H.; Bunzel, R.J.; Huang, G.Q.; Mishra, V., et al. An exposed domain in the severe acute respiratory syndrome coronavirus spike protein induces neutralizing antibodies. *J Virol* **2004**, *78*, 7217-7226, doi:10.1128/jvi.78.13.7217-7226.2004.
  66. Wang, J.Q.; Wen, J.; Li, J.X.; Yin, J.N.; Zhu, Q.Y.; Wang, H.; Yang, Y.K.; De Qin, E.; You, B.; Li, W., et al. Assessment of immunoreactive synthetic peptides from the structural proteins of severe acute respiratory syndrome coronavirus. *Clin Chem* **2003**, *49*, 1989-1996, doi:10.1373/clinchem.2003.023184.
  67. Wang, Q.D.; Zhang, L.F.; Kuwahara, K.; Li, L.; Liu, Z.J.; Li, T.S.; Zhu, H.; Liu, J.N.; Xu, Y.F.; Xie, J., et al. Immunodominant SARS Coronavirus Epitopes in Humans Elicited both Enhancing and Neutralizing Effects on Infection in Non-human Primates. *ACS Infect Dis* **2016**, *2*, 361-376, doi:10.1021/acsinfecdis.6b00006.
  68. Miyoshi-Akiyama, T.; Ishida, I.; Fukushi, M.; Yamaguchi, K.; Matsuoka, Y.; Ishihara, T.; Tsukahara, M.; Hatakeyama, S.; Itoh, N.; Morisawa, A., et al. Fully Human Monoclonal Antibody Directed to Proteolytic Cleavage Site in Severe Acute Respiratory Syndrome (SARS) Coronavirus S Protein Neutralizes the Virus in a Rhesus Macaque SARS Model. *J Infect Dis* **2011**, *203*, 1574-1581, doi:10.1093/infdis/jir084.

69. Shichijo, S.; Keicho, N.; Long, H.T.; Quy, T.; Phi, N.C.; Ha, L.D.; Ban, V.V.; Itoyama, S.; Hu, C.J.; Komatsu, N., et al. Assessment of synthetic peptides of severe acute respiratory syndrome coronavirus recognized by long-lasting immunity. *Tissue Antigens* **2004**, *64*, 600-607, doi:10.1111/j.1399-0039.2004.00314.x.
70. Ng, O.W.; Keng, C.T.; Leung, C.S.W.; Peiris, J.S.M.; Poon, L.L.M.; Tan, Y.J. Substitution at Aspartic Acid 1128 in the SARS Coronavirus Spike Glycoprotein Mediates Escape from a S2 Domain-Targeting Neutralizing Monoclonal Antibody. *PLoS One* **2014**, *9*, doi:10.1371/journal.pone.0102415.
71. Qian, C.; Qin, D.; Tang, Q.; Zeng, Y.; Tang, G.X.; Lu, C. Identification of a B-cell antigenic epitope at the N-terminus of SARS-CoV M protein and characterization of monoclonal antibody against the protein. *Virus Genes* **2006**, *33*, 147-156, doi:10.1007/s11262-005-0050-8.
72. Yu, M.; Stevens, V.; Berry, J.D.; Cramer, G.; McEachern, J.; Tu, C.C.; Shi, Z.L.; Liang, G.D.; Weingartl, H.; Cardoso, J., et al. Determination and application of immunodominant regions of SARS coronavirus spike and nucleocapsid proteins recognized by sera from different animal species. *J Immunol Methods* **2008**, *331*, 1-12, doi:10.1016/j.jim.2007.11.009.
73. van den Brink, E.N.; ter Meulen, J.; Cox, F.; Jongeneelen, M.A.C.; Thijsse, A.; Throsby, M.; Marissen, W.E.; Rood, P.M.L.; Bakker, A.B.H.; Gelderblom, H.R., et al. Molecular and biological characterization of human monoclonal antibodies binding to the spike and nucleocapsid proteins of severe acute respiratory syndrome coronavirus. *J Virol* **2005**, *79*, 1635-1644, doi:10.1128/jvi.79.3.1635-1644.2005.
74. Shin, G.C.; Chung, Y.S.; Kim, I.S.; Cho, H.W.; Kang, C. Preparation and characterization of a novel monoclonal antibody specific to severe acute respiratory syndrome-coronavirus nucleocapsid protein. *Virus Res* **2006**, *122*, 109-118, doi:10.1016/j.virusres.2006.07.004.
75. Bussmann, B.M.; Reiche, S.; Jacob, L.H.; Braun, J.M.; Jassoy, C. Antigenic and cellular localisation analysis of the severe acute respiratory syndrome coronavirus nucleocapsid protein using monoclonal antibodies. *Virus Res* **2006**, *122*, 119-126, doi:10.1016/j.virusres.2006.07.005.
76. Liu, S.J.; Leng, C.H.; Lien, S.P.; Chi, H.Y.; Huang, C.Y.; Lin, C.L.; Lian, W.C.; Chen, C.J.; Hsieh, S.L.; Chong, P. Immunological characterizations of the nucleocapsid protein based SARS vaccine candidates. *Vaccine* **2006**, *24*, 3100-3108, doi:10.1016/j.vaccine.2006.01.058.
77. Liang, Y.F.; Wan, Y.; Qiu, L.W.; Zhou, J.G.; Ni, B.; Guo, B.; Zou, Q.; Zou, L.Y.; Zhou, W.; Jia, Z.C., et al. Comprehensive antibody epitope mapping of the nucleocapsid protein of severe acute respiratory syndrome (SARS) coronavirus: Insight into the humoral immunity of SARS. *Clin Chem* **2005**, *51*, 1382-1396, doi:10.1373/clinchem.2005.051045.
78. Tang, T.K.; Wu, M.P.J.; Chen, S.T.; Hou, M.H.; Hong, M.H.; Pan, F.M.; Yu, H.M.; Chen, J.H.; Yao, C.W.; Wang, A.H.J. Biochemical and immunological studies of nucleocapsid proteins of severe acute respiratory syndrome and 229E human coronaviruses. *Proteomics* **2005**, *5*, 925-937, doi:10.1002/pmic.200401204.
79. Li, S.; Lin, L.; Wang, H.; Yin, J.; Ren, Y.; Zhao, Z.; Wen, J.; Zhou, C.; Zhang, X.; Li, X., et al. The epitope study on the SARS-CoV nucleocapsid protein. *Genom Proteom Bioinf* **2003**, *1*, 198-206.

80. He, Y.X.; Zhou, Y.S.; Wu, H.; Kou, Z.H.; Liu, S.W.; Jiang, S.B. Mapping of antigenic sites on the nucleocapsid protein of the severe acute respiratory syndrome coronavirus. *J Clin Microbiol* **2004**, *42*, 5309-5314, doi:10.1128/jcm.42.11.5309-5314.2004.
